# Supplementary material for: Effects of sound exposure from a seismic airgun on heart rate, acceleration and depth use in free-swimming Atlantic cod and saithe
Source: PubMed Central journal article supplement (PMC6521782; doi:10.1093/conphys/coz020), 2019-05-16
Supplement: supp_coz020.pdf [file supp_coz020.pdf]

735 Table S1: Overview of sound exposures in Vinjefjorden 21-23 November 2017. Type of exposure: *Transect* means that the airgun was towed 11 m behind the  
 736 boat at 4 m depth at a speed of 8.1–8.5 km h<sup>-1</sup>, with a shooting sequence of 1 shoot per 10 s. *Towing of airgun, no shooting* means that the airgun was towed  
 737 from the last position of the active shooting transect to the mooring location. Boat speed and airgun depth were similar to those used during the *transects*.  
 738 *Stationary* means that the boat was moored during the shooting sequence. Time and bar pressure of first and last shooting of the sound exposures are also  
 739 given.

| Date       | Exposure number | Type of sound exposure        | First shoot (UTC and bar pressure of airgun) | Last shoot (UTC and bar pressure of airgun) | Times of towing of airgun, no shooting (UTC) |
|------------|-----------------|-------------------------------|----------------------------------------------|---------------------------------------------|----------------------------------------------|
| 21.11.2017 | 1               | Transect                      | 12:07 = 138 bar                              | 13:13 = 138 bar                             |                                              |
| 21.11.2017 | 2               | Towing of airgun, no shooting | NA                                           | NA                                          | 14:07-14:35                                  |
| 21.11.2017 | 3               | Stationary                    | 14:37 = 125 bar                              | 14:43 = 100 bar                             |                                              |
| 22.11.2017 | 4               | Transect                      | 09:29 = 135 bar                              | 10:29 = 135 bar                             |                                              |
| 22.11.2017 | 5               | Towing of airgun, no shooting | NA                                           | NA                                          | 10:33-10:40                                  |
| 22.11.2017 | 6               | Stationary                    | 13:17 = 130 bar                              | 13:27 = 125 bar                             |                                              |
| 23.11.2017 | 7               | Transect                      | 11:24 = 138 bar                              | 12:26 = 138 bar                             |                                              |
| 23.11.2017 | 8               | Towing of airgun, no shooting | NA                                           | NA                                          | 12:28-12:40                                  |
| 23.11.2017 | 9               | Stationary                    | 13:53 = 138 bar                              | 14:03 = 138 bar                             |                                              |

741 Table S2. Definitions of equations from the ISO 18405 standard that were used for the different  
742 calculations related to the sound pressure and particle acceleration analysis.

| ISO 18405 Chapter | Definition                                   | Abbreviation                 | Unit                                                          |
|-------------------|----------------------------------------------|------------------------------|---------------------------------------------------------------|
| 3.2.1.9           | Sound Exposure Spectral Density              | Sound ESD                    | dB re 1 $\mu\text{Pa}^2 \cdot \text{s}/\text{Hz}$             |
| 3.2.1.5           | Sound Exposure Level                         | $\text{SEL}_{\text{sp/cum}}$ | dB re 1 $\mu\text{Pa}^2 \cdot \text{s}$                       |
| 3.2.2.1           | Zero to Peak Sound Pressure Level            | $P_{0\text{-pk}}$            | dB re 1 $\mu\text{Pa}$                                        |
| -                 | Acceleration Exposure Spectral Density level | Acceleration ESD             | dB re 1 $(\mu\text{m}/\text{s}^2)^2 \cdot \text{s}/\text{Hz}$ |
| -                 | Acceleration Exposure Level                  | $\text{AEL}_{\text{sp/cum}}$ | dB re 1 $(\mu\text{m}/\text{s}^2)^2 \cdot \text{s}$           |
| -                 | Zero to Peak Acceleration Level              | $A_{0\text{-pk}}$            | dB re 1 $\mu\text{m}/\text{s}^2$                              |

743

744

745

746 Table S3. Daily resting heart rate (beats per minute) for each individual. Resting heart rate was  
747 calculated as the mean of the lowest 10% heart rate values recorded each day.

748

| Fish ID | 2017-11-20 | 2017-11-21 | 2017-11-22 | 2017-11-23 | 2017-11-24 | Mean     |
|---------|------------|------------|------------|------------|------------|----------|
| 1       | 15         | 14.54167   | 14.15278   | 15.30556   | 15.44444   | 14.83333 |
| 2       | 27.06944   | 25.29167   | 22.15278   | 22.51389   | 24.68056   | 23.29398 |
| 3       | 16.40278   | 16.72222   | 15.27778   | 18.34722   | 16.36111   | 16.32407 |
| 4       | 16.52778   | 15.91667   | 14.20833   | 16.38889   | 16.47222   | 15.55556 |
| 5       | 21.05556   | 21.95833   | 19.19444   | 19.79167   | 19.47222   | 19.2662  |
| 6       | 19.13889   | 19.09722   | 18.30556   | 16.73611   | 17.51389   | 17.71991 |
| 7       | 22.84722   | 22.88889   | 21.01389   | 22.68056   | 22.31944   | 21.90972 |
| 8       | 24.25      | 25.98611   | 28.69444   | 36.44444   | 39.88889   | 25.26852 |
| 9       | 17.51389   | 16.66667   | 17.04167   | 17.31944   | 16.77778   | 17.21296 |
| 10      | 20.25      | 20.22222   | 19.79167   | 21.30556   | 20.59722   | 20.51157 |
| 11      | NA         | NA         | NA         | NA         | NA         | NA       |
| 12      | 14.94444   | 14.80556   | 13.19444   | 14.22222   | 14.22222   | 14.18981 |
| 13      | 34.11111   | 30.73611   | 29.93056   | 30.375     | 35.66667   | 31.07176 |
| 14      | 27.98611   | 28.93056   | 27.73611   | 28.54167   | 29.70833   | 28.36574 |
| 15      | 26.79167   | 30.06944   | 27.54167   | 27.875     | 32.63889   | 27.72685 |
| 16      | NA         | NA         | NA         | NA         | NA         | NA       |
| 17      | NA         | NA         | NA         | NA         | NA         | NA       |
| 18      | NA         | NA         | NA         | NA         | NA         | NA       |
| 19      | NA         | NA         | NA         | NA         | NA         | NA       |
| 20      | NA         | NA         | NA         | NA         | NA         | NA       |
| 21      | NA         | NA         | NA         | NA         | NA         | NA       |
| 22      | NA         | NA         | NA         | NA         | NA         | NA       |
| 23      | 15.66667   | 18.18056   | 17.05556   | 18.25      | 18.56944   | 16.31481 |
| 24      | NA         | NA         | NA         | NA         | NA         | NA       |
| 25      | 19.06944   | 20.97222   | 18.95833   | 18.55556   | 20.93056   | 18.12731 |
| 26      | NA         | NA         | NA         | NA         | NA         | NA       |
| 27      | 22.88889   | 20.15278   | 19.20833   | 18.77778   | 18.83333   | 19.19192 |
| 28      | 26.44444   | 22.25      | 20.45833   | 19.36364   | NA         | 20.50761 |
| 29      | 26.77778   | 22.66667   | 18.84722   | 18         | 20.47222   | 19.09091 |
| 30      | 34.11111   | 22.86111   | 23.26389   | 25.02778   | 24.59722   | 23.78114 |

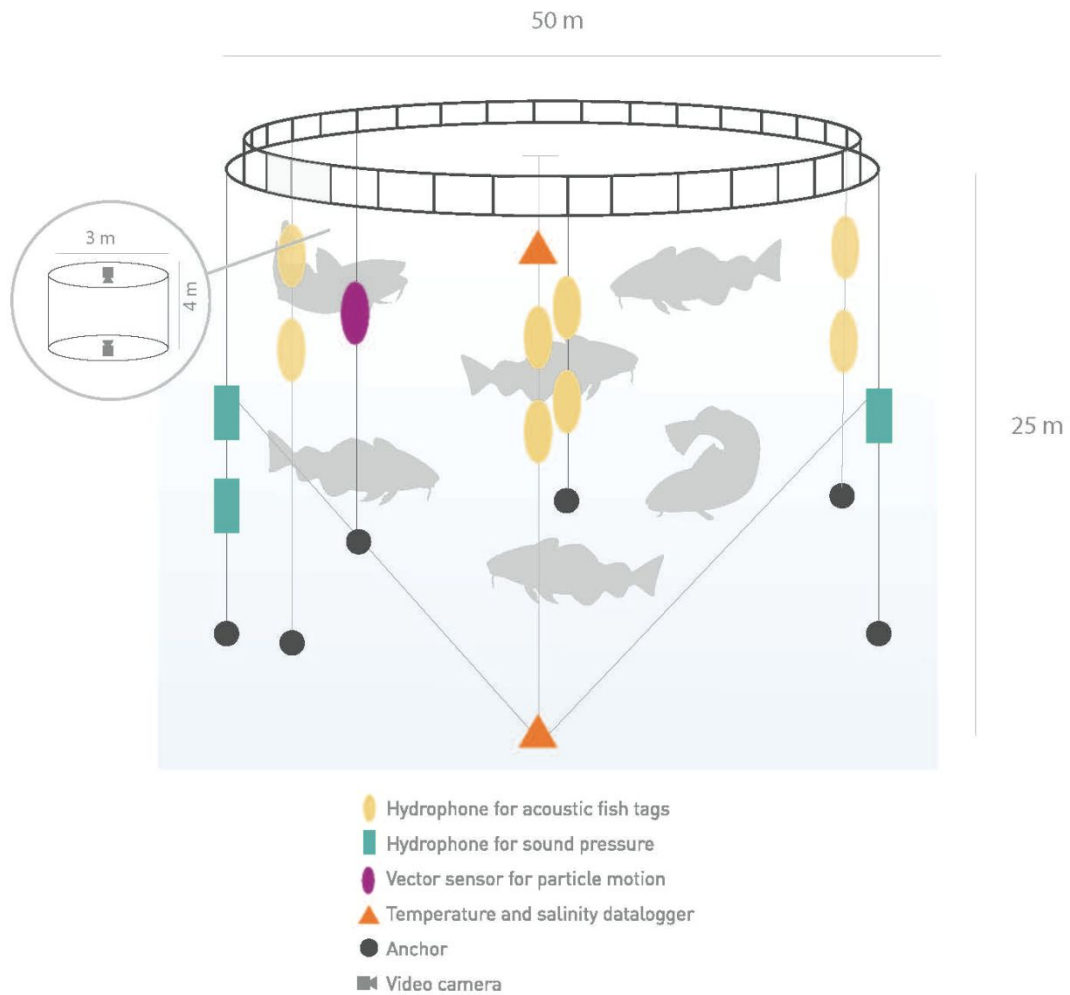

749

750 Figure S1: Location of various sensors in the sea cage during the sound exposure experiment. The  
 751 boat towing the airgun arrived from what is shown as the left side of the pen in the figure, passed  
 752 around the sea cage, first on the front side and then on the back side of the pen, and then exited on the  
 753 left side. The small net pen indicated by the insert on the left side was equipped with a video  
 754 monitoring system and placed on the western (left) side of the large sea cage.

755

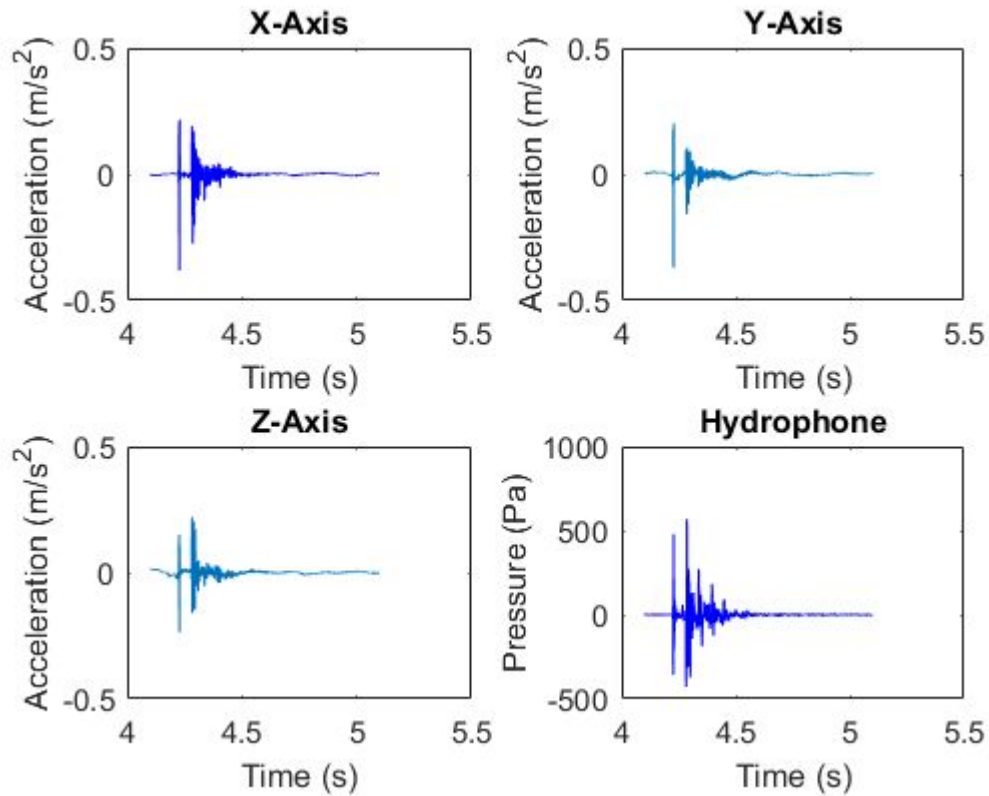

756

757 Figure S2. Time series of an airgun pulse when the airgun was stationary 200 m away, showing the  
758 acceleration at the sea cage for the three axes and the hydrophone output.

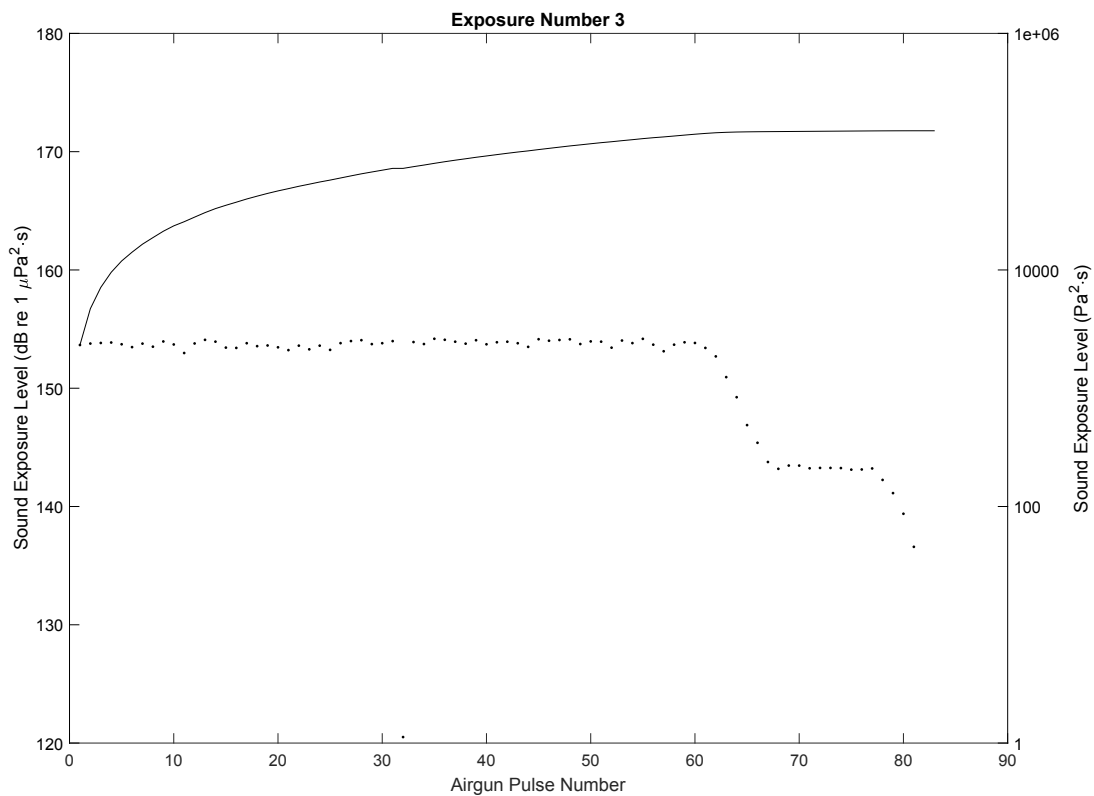

759  
 760 Figure S3. Sound exposure level (single pulse and cumulative) when the airgun was stationary 200  
 761 away from the sea cage during exposure 3 on day 1. The dots represent the SEL<sub>sp</sub> and the curve the  
 762 SEL<sub>cum</sub>.

763

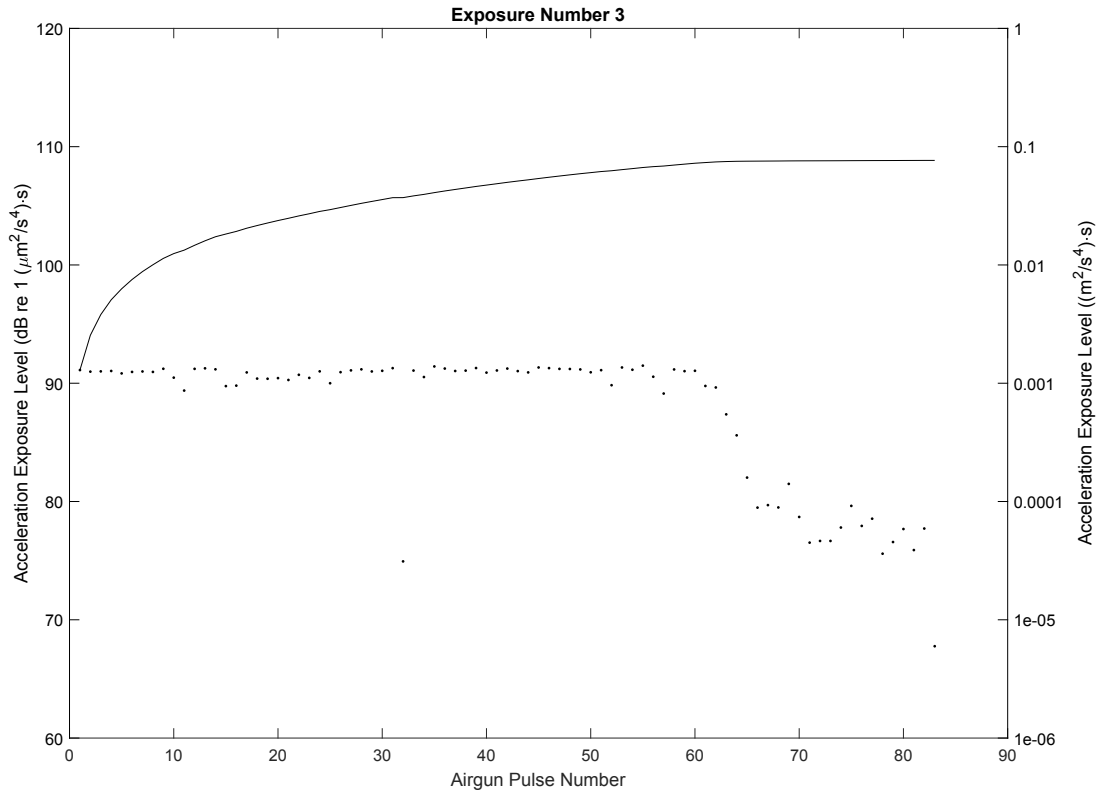

764

765 Figure S4. Acceleration exposure level (single pulse and cumulative) when the airgun was stationary,  
 766 exposure number 3 (day 1), 200 away from the sea cage. The dots represent the  $\text{AEL}_{\text{sp}}$  and the curve  
 767 the  $\text{AEL}_{\text{cum}}$ .

768

769

770

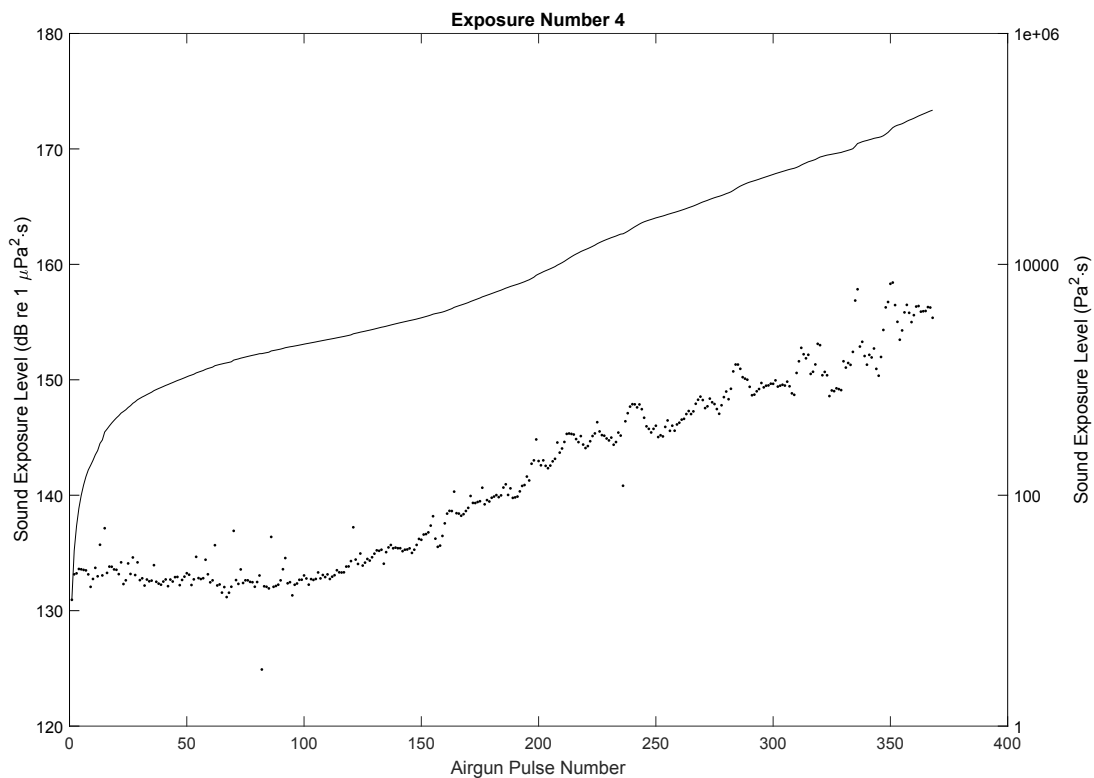

771  
 772 Figure S5. Sound exposure level (single pulse and cumulative) when the airgun was moving 100-6700  
 773 m away from the sea cage during exposure 4 on day 2. The dots represent the SEL<sub>sp</sub> and the curve the  
 774 SEL<sub>cum</sub>.

775  
 776

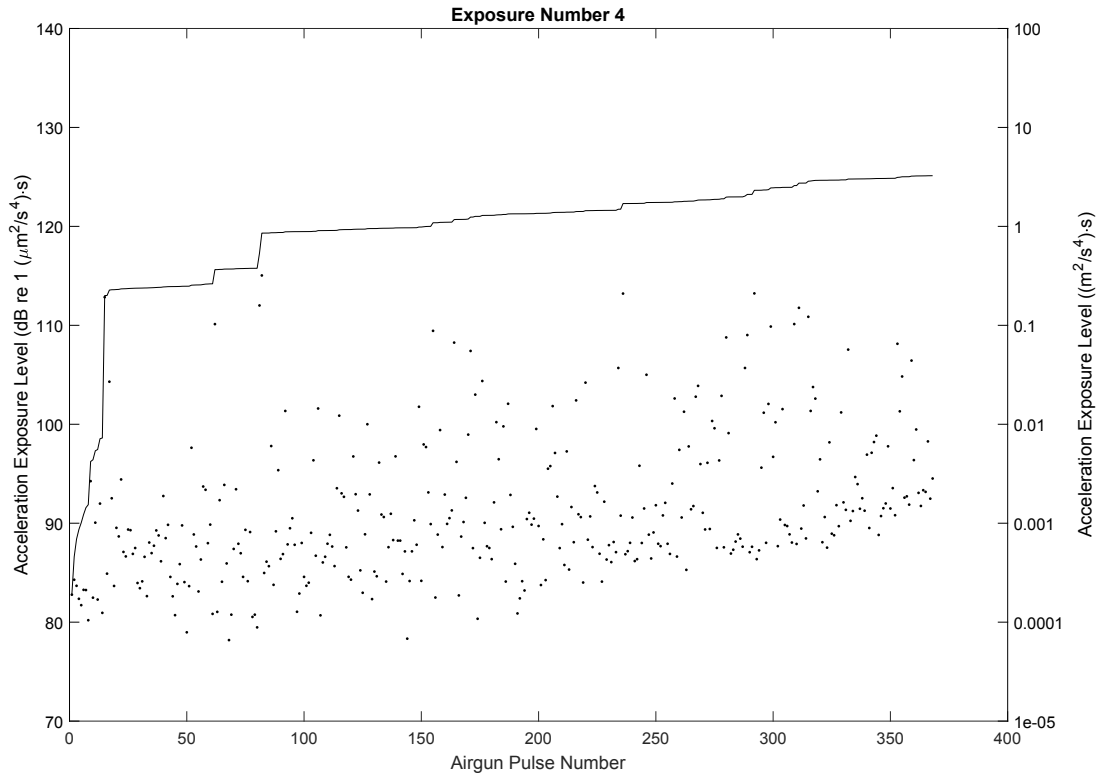

777

778 Figure S6. Acceleration exposure level (single pulse and cumulative) when the airgun was moving

779 100-6700 m away from the sea cage during exposure number 4 on day 2. The dots represent the  $\text{AEL}_{\text{sp}}$ 780 and the curve the  $\text{AEL}_{\text{cum}}$ .



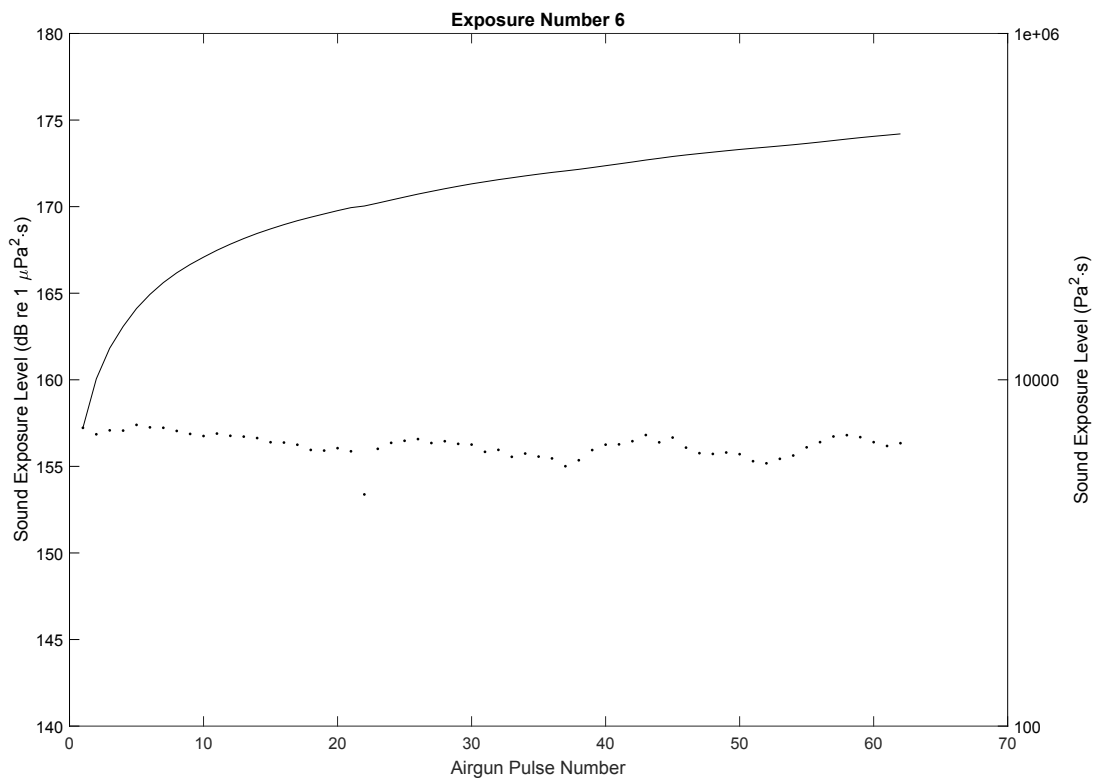

781  
 782 Figure S7. Sound Exposure Level (single pulse and cumulative) when the airgun was stationary 200 m  
 783 away from the sea cage during exposure 6 on day 2. The dots represent the  $\text{SEL}_{\text{sp}}$  and the curve the  
 784  $\text{SEL}_{\text{cum}}$ .

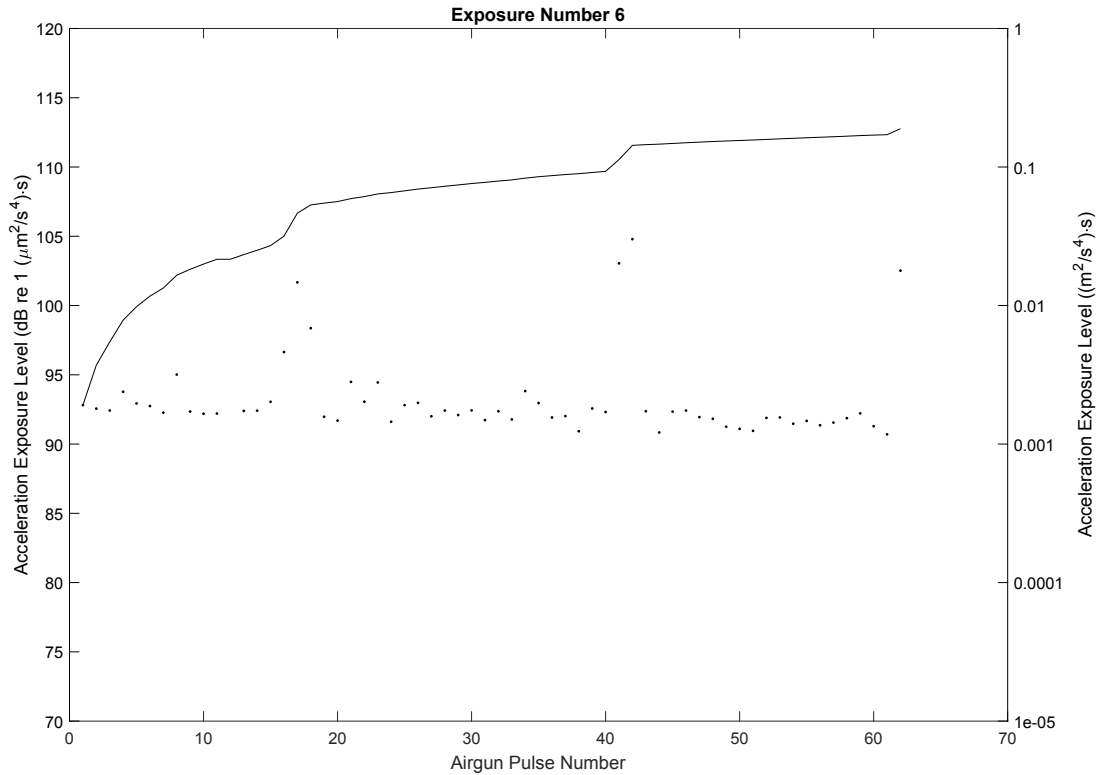

785

786 Figure S8. Acceleration Exposure Level (single pulse and cumulative) when the airgun was stationary  
 787 200 m away from the sea cage during exposure 6 on day 2. The dots represent the  $\text{AEL}_{\text{sp}}$  and the curve  
 788 the  $\text{AEL}_{\text{cum}}$ .

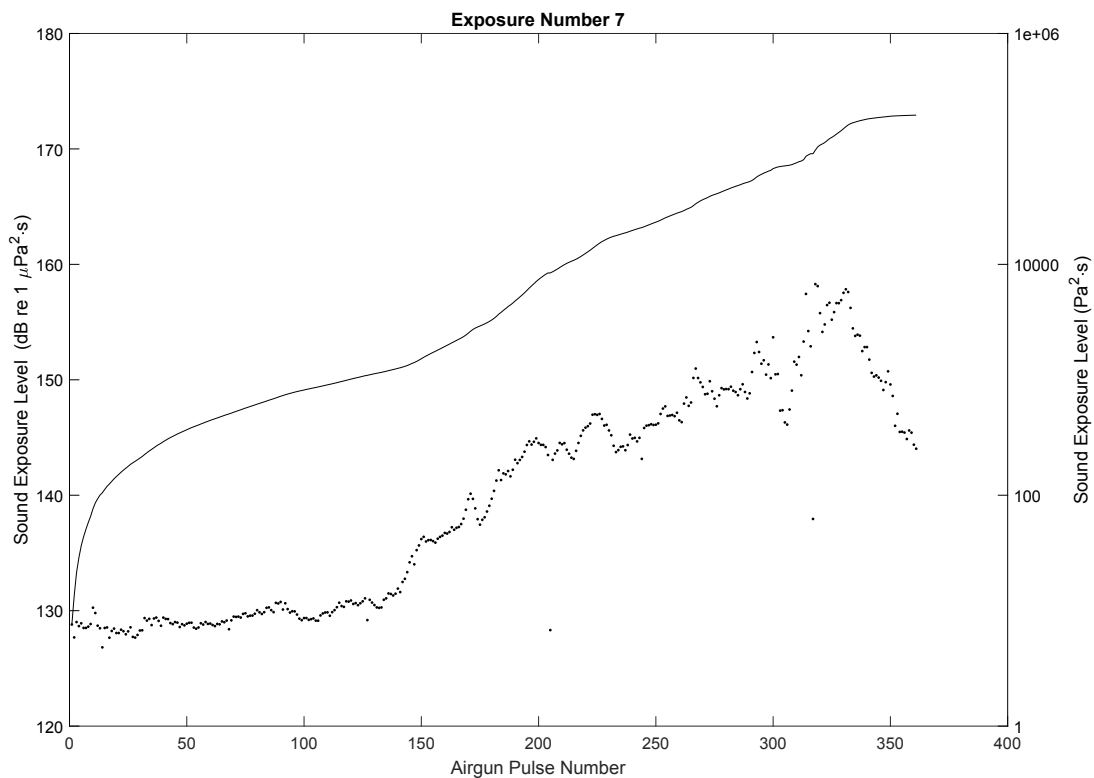

789  
 790 Figure S9. Sound Exposure Level (single pulse and cumulative) when the airgun was moving 100-  
 791 6700 m away from the sea cage during exposure 7 on day 3. The dots represent the  $SEL_{sp}$  and the  
 792 curve the  $SEL_{cum}$ .

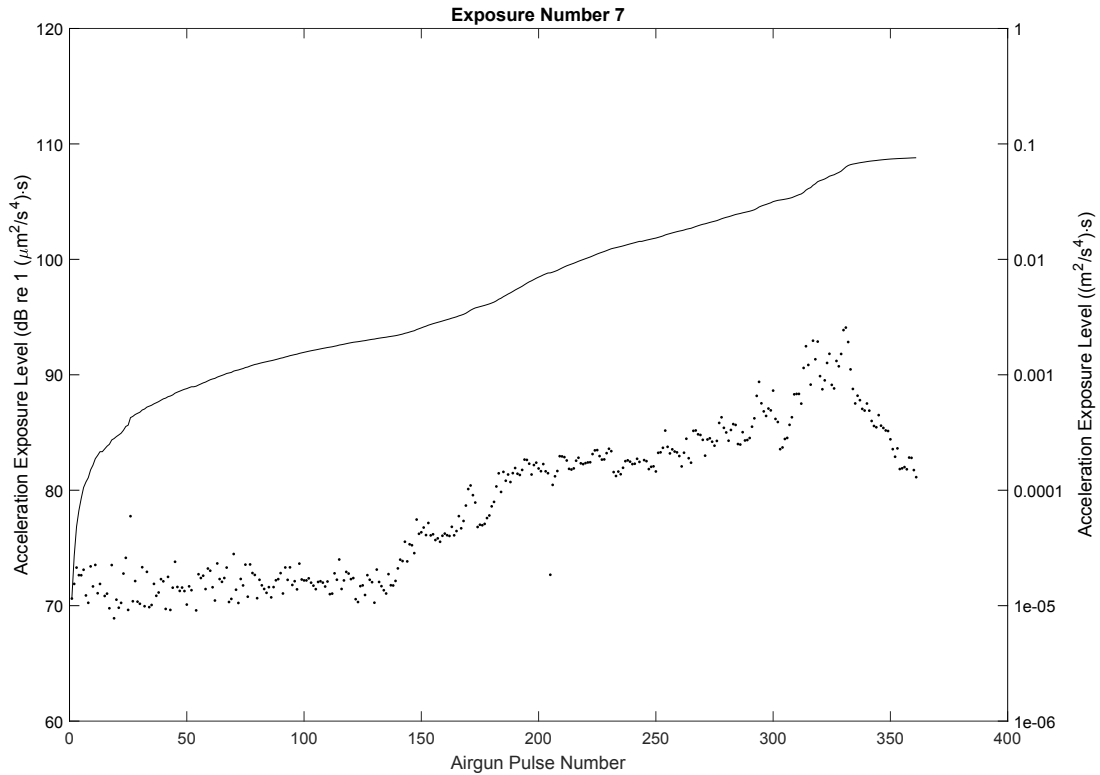

793

794 Figure S10. Acceleration Exposure Level (single pulse and cumulative) when the airgun was moving  
 795 100-6700 m away from the sea cage during exposure 7 on day 3. The dots represent the  $\text{AEL}_{\text{sp}}$  and the  
 796 curve the  $\text{AEL}_{\text{cum}}$ .

797

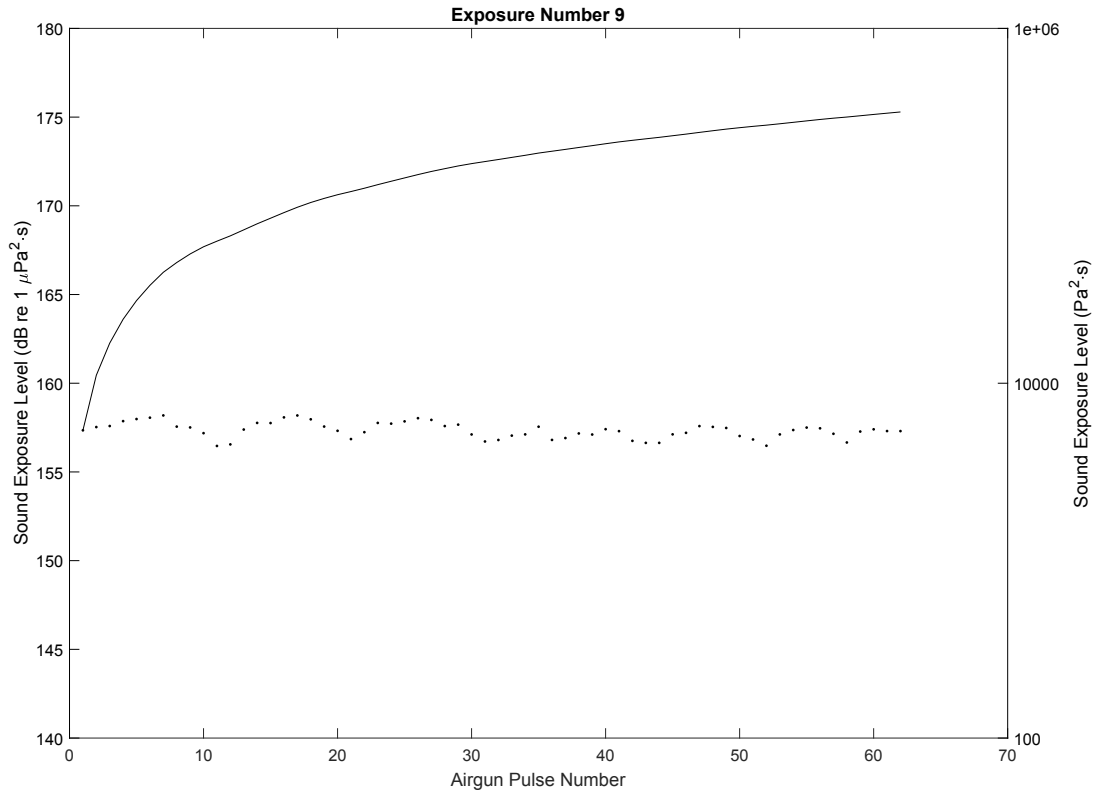

798

799 Figure S11. Sound Exposure Level (single pulse and cumulative) when the airgun was stationary 200  
 800 m away from the sea cage during exposure 9 on day 3. The dots represent the SEL<sub>sp</sub> and the curve the  
 801 SEL<sub>cum</sub>.

Manuscript Only

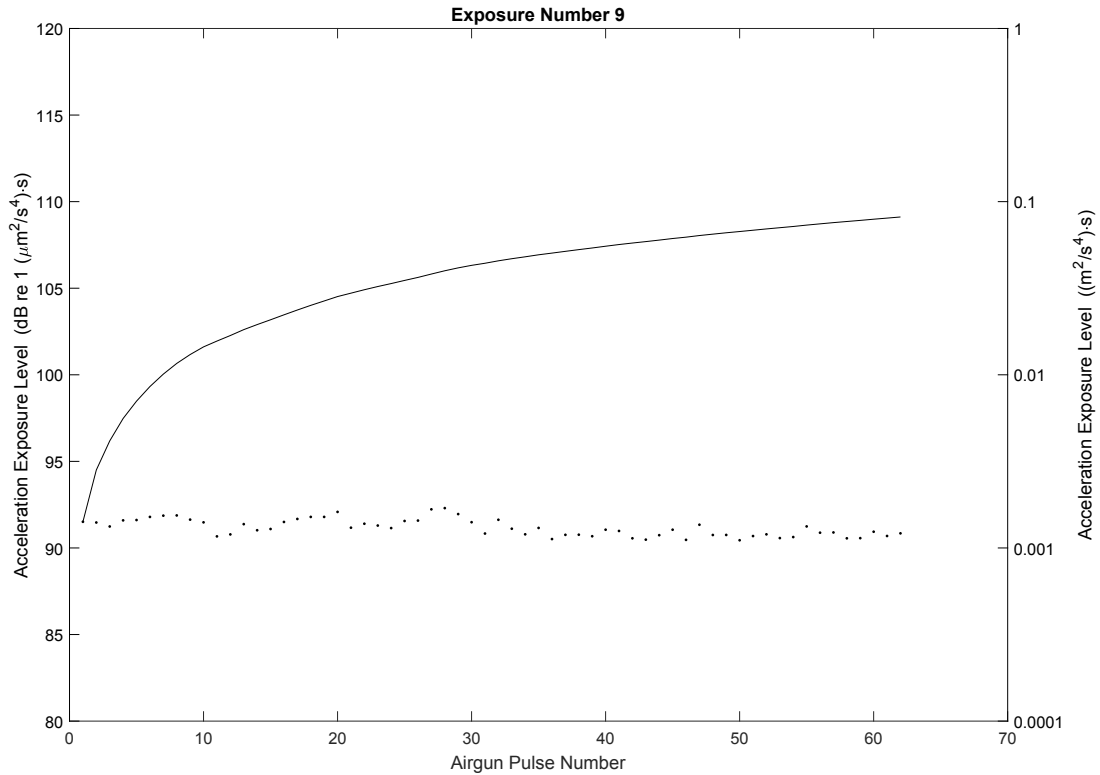

802

803 Figure S12. Acceleration Exposure Level (single pulse and cumulative) when the airgun was  
 804 stationary 200 m away from the sea cage during exposure 9 on day 3. The dots represent the AEL<sub>sp</sub>  
 805 and the curve the AEL<sub>cum</sub>.

806

807

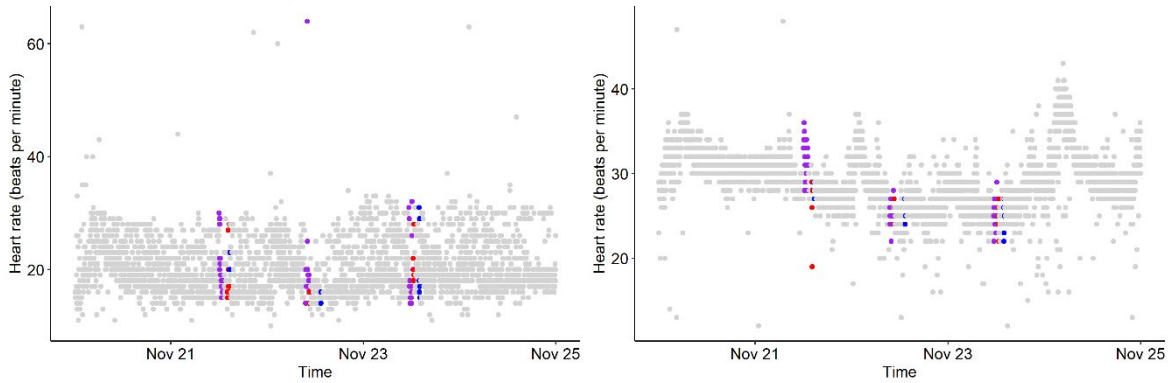

808

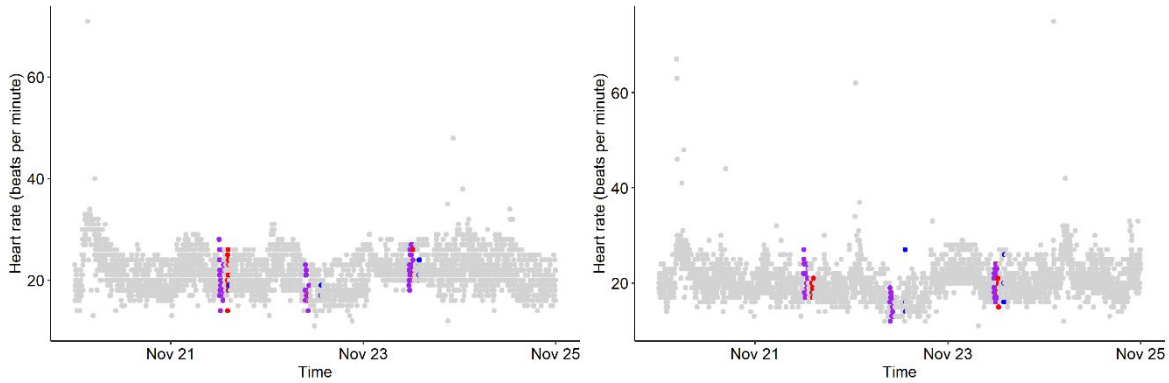

809

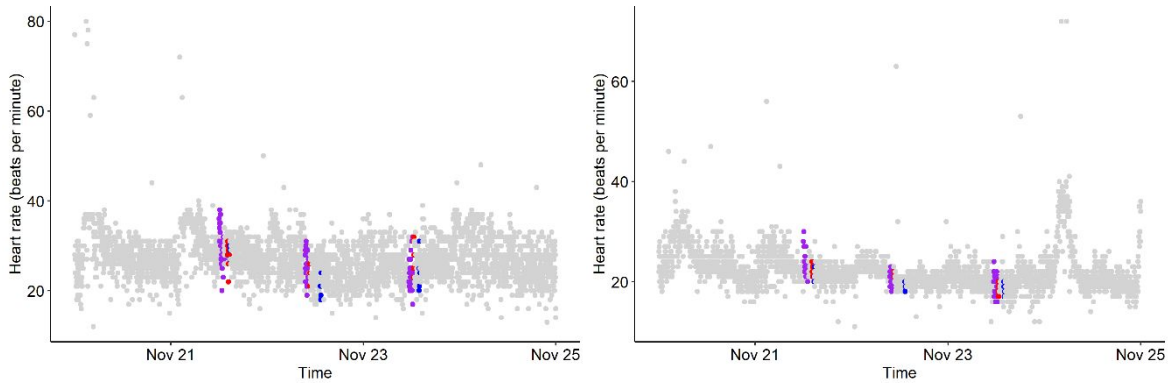

810

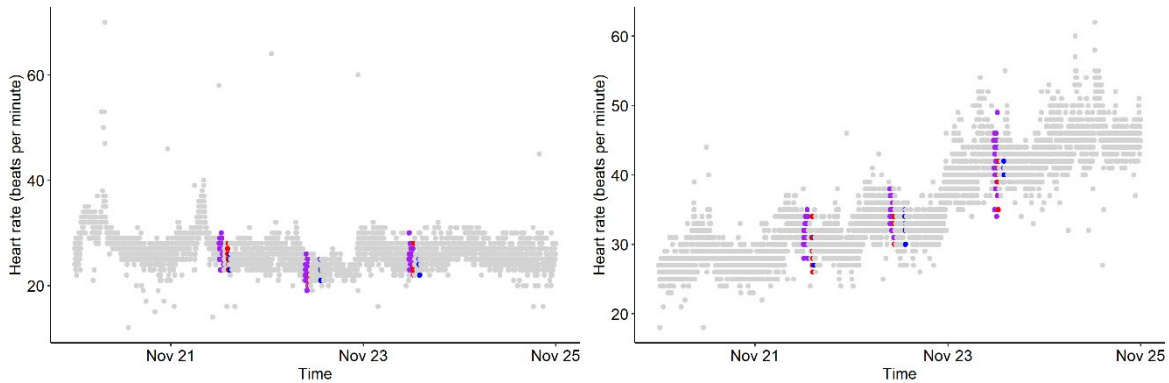

811

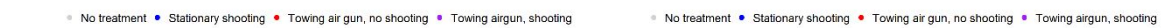

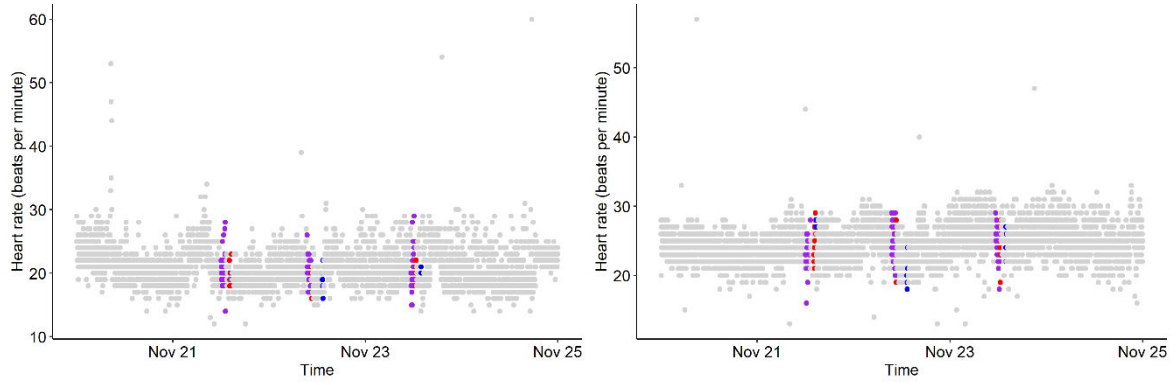

812

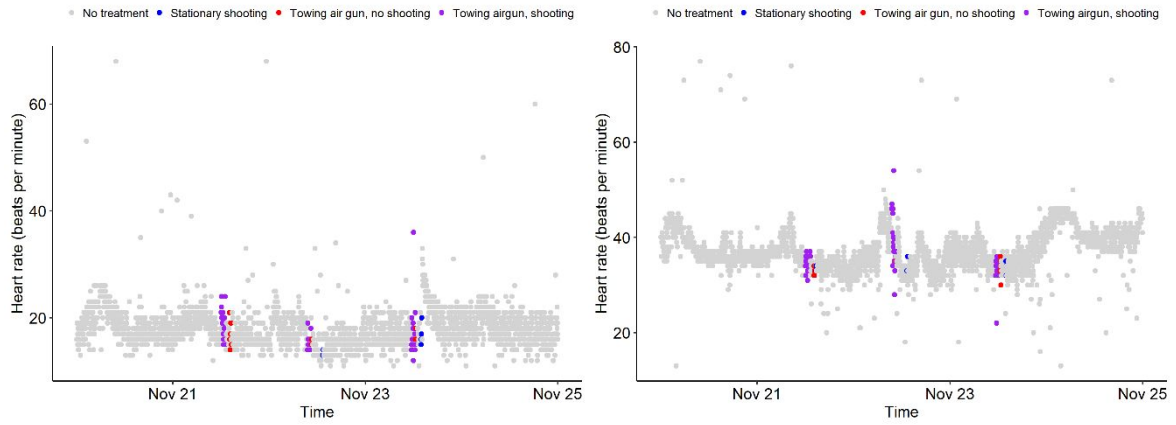

813

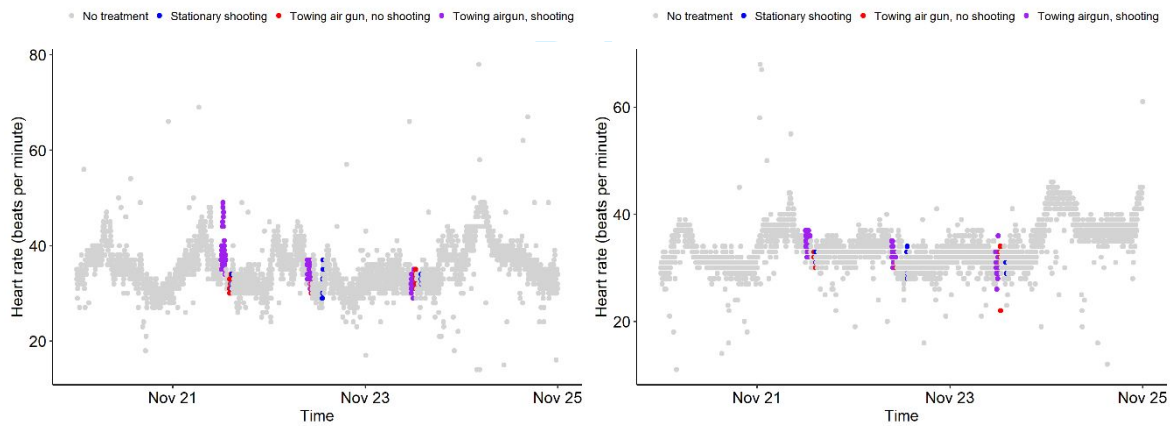

814

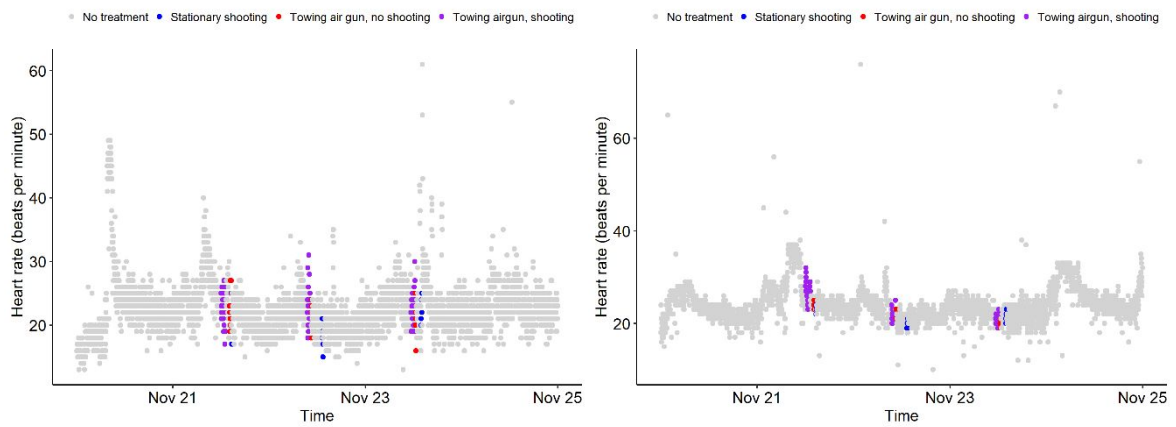

815

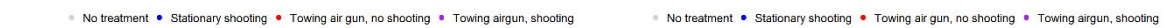



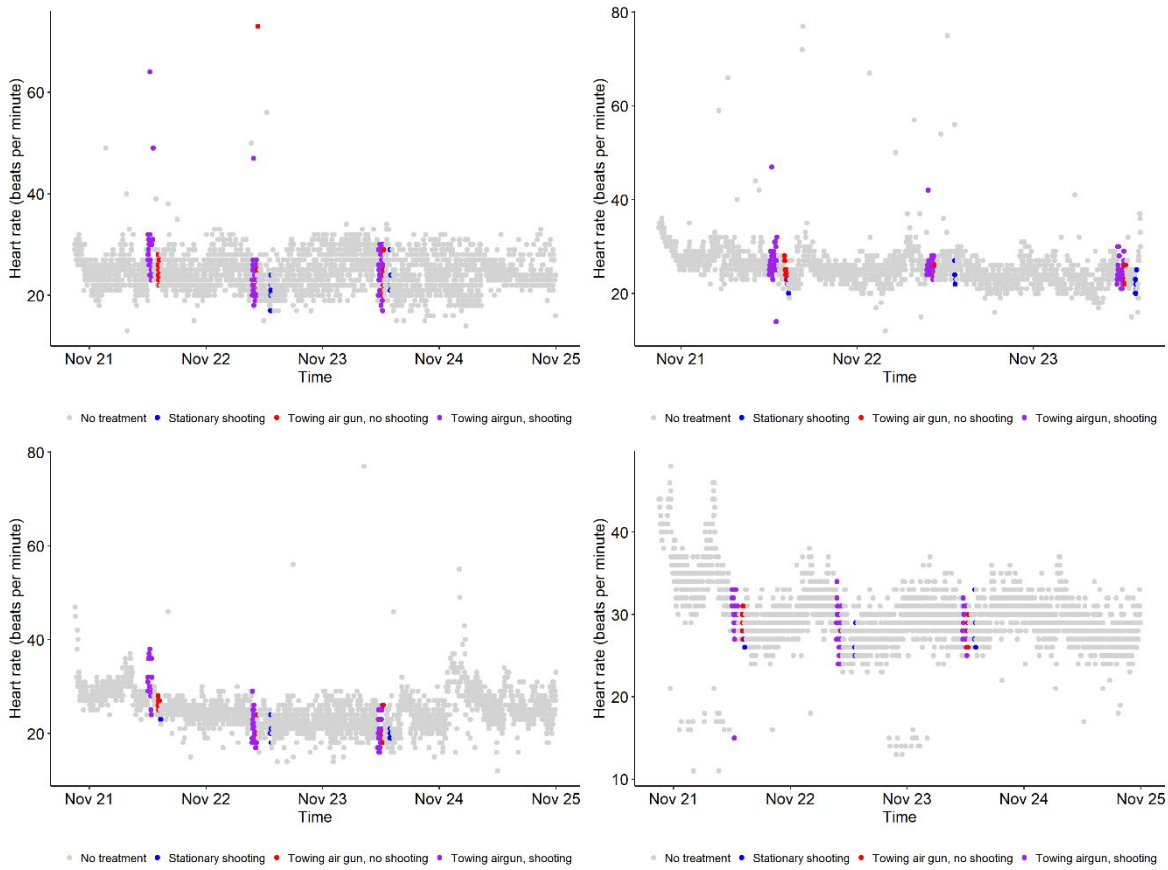

816

817

818 Figure S13. Heart rate traces of individual fish during the experimental period. Heart rate  
 819 traces start November 20, 2017 a midnight and end November 25, 2017 a midnight.
